# Supplementary material for: Considering Transposable Element Diversification in De Novo Annotation Approaches
Source: PLOS journal article supplement (doi:10.1371/journal.pone.0016526), 2011-01-31
Supplement: S14 (10.1371/journal.pone.0016526.s014) [file journal.pone.0016526.s014]

**Table S11: Comparison of the performances of the RepeatModeler and TEdenovo databanks**

| Genome         | Pipeline      | Consensus | $S_n^*$ | $S_p^*$ | $R_{cc}$ |
|----------------|---------------|-----------|---------|---------|----------|
| <i>D. mel.</i> | RepeatModeler | 141       | 77.78%  | 75.89%  | 19.11%   |
|                | TEdenovo      | 593       | 92.31%  | 75.72%  | 77.94%   |
| <i>A. tha.</i> | RepeatModeler | 177       | 45.90%  | 57.63%  | 5.19%    |
|                | TEdenovo      | 1351      | 74.43%  | 66.75%  | 49.35%   |

$S_n^*$ : percentage of “knowledge-based” consensus sequences matching a *de novo* consensus

$S_p^*$ : percentage of *de novo* consensus sequences matching a “knowledge-based” consensus

$R_{cc}$ : percentage of fully recovered “knowledge-based” consensus sequences
