# Supplementary material for: Considering Transposable Element Diversification in De Novo Annotation Approaches
Source: PLOS journal article supplement (doi:10.1371/journal.pone.0016526), 2011-01-31
Supplement: S17 (10.1371/journal.pone.0016526.s017) [file journal.pone.0016526.s017]

**Table S14: Reference sequences entirely retrieved by one clustering method but not by the others, in the *D. melanogaster* genome**

| Family       | Classification | Length of the reference sequence | Number of full-length fragments | Number of full-length copies | Clustering method retrieving the entire reference sequence | Results of the other clustering methods |
|--------------|----------------|----------------------------------|---------------------------------|------------------------------|------------------------------------------------------------|-----------------------------------------|
| invader3     | Class I LTR    | 5484                             | 3                               | 4                            | GROUPER                                                    | R:CI / P:NA                             |
| invader4     | Class I LTR    | 3105                             | 1                               | 2                            | GROUPER                                                    | R:II / P:IC                             |
| Stalker      | Class I LTR    | 7256                             | 3                               | 3                            | GROUPER                                                    | R:II / P:IC                             |
| Stalker4     | Class I LTR    | 7359                             | 2                               | 3                            | GROUPER                                                    | R:II / P:IC                             |
| 1360         | Class II TIR   | 3409                             | 2                               | 2                            | RECON                                                      | G:IC / P:IC                             |
| Doc2-element | Class I LINE   | 4789                             | 1                               | 3                            | RECON                                                      | G:IC / P:II                             |
| G2           | Class I LINE   | 3102                             | 4                               | 4                            | RECON                                                      | G:IC / P:II                             |
| gypsy4       | Class I LTR    | 6852                             | 0                               | 3                            | RECON                                                      | G:IC / P:NA                             |
| Max-element  | Class I LTR    | 8556                             | 2                               | 2                            | RECON                                                      | G:IC / P:NA                             |
| R1A1-element | Class I LINE   | 5356                             | 2                               | 2                            | RECON                                                      | G:IC / P:NA                             |
| rover        | Class I LTR    | 7318                             | 2                               | 2                            | RECON                                                      | G:IC / P:II                             |
| Tabor        | Class I LTR    | 7345                             | 2                               | 2                            | RECON                                                      | G:IC / P:II                             |
| Tc1-2        | Class II TIR   | 1644                             | 1                               | 1                            | RECON                                                      | G:IC / P:NA                             |

In the column on the far right, “G” stands for GROUPER, “R” for RECON and “P” for PILER. “CI” indicates that the reference sequence matches completely (over more than 95% of its length) a *de novo* consensus, which matches incompletely (over less than 95% of its length). “IC” means that the reference sequence matches incompletely whereas the *de novo* consensus matches completely. “II” indicates that both sequences match incompletely. “NA” indicates that the reference sequence matches none of the *de novo* consensus sequences.
