# Supplementary material for: Considering Transposable Element Diversification in De Novo Annotation Approaches
Source: PLOS journal article supplement (doi:10.1371/journal.pone.0016526), 2011-01-31
Supplement: S19 (10.1371/journal.pone.0016526.s019) [file journal.pone.0016526.s019]

**Table S16: List of TE families represented by several *de novo* consensus sequences**

| Genome         | Reference sequence(s)          | Consensus from GROUPER | Consensus from RECON | Consensus from PILER |
|----------------|--------------------------------|------------------------|----------------------|----------------------|
| <i>D. mel.</i> | Stalker, Stalker2 and Stalker4 | 15                     | 3                    | 0                    |
|                | FB                             | 11                     | 8                    | 0                    |
|                | invader1                       | 5                      | 1                    | 1                    |
|                | GATE                           | 3                      | 2                    | 0                    |
|                | 297                            | 3                      | 1                    | 1                    |
|                | bagbins                        | 1                      | 4                    | 0                    |
|                | invader4                       | 2                      | 2                    | 1                    |
|                | Idefix                         | 1                      | 2                    | 1                    |
|                | springer, gypsy3               | 0                      | 3                    | 0                    |
|                | mdg1                           | 2                      | 0                    | 1                    |
|                | micropia                       | 1                      | 2                    | 0                    |
| <i>A. tha.</i> | ATHILA6A, ATHILA6B             | 8                      | 3                    | 0                    |
|                | SIMPLEHAT2                     | 7                      | 3                    | 1                    |
|                | ATREP1, ATREP2                 | 5                      | 2                    | 2                    |
|                | ATGP2N                         | 4                      | 1                    | 0                    |
|                | ARNOLDY1, ARNOLDY2             | 2                      | 5                    | 0                    |
|                | ARNOLD1 to 4                   | 2                      | 5                    | 0                    |
|                | VANDAL2                        | 3                      | 3                    | 0                    |
|                | ATLANTYS2                      | 1                      | 4                    | 0                    |
|                | ATHILA4D                       | 3                      | 2                    | 1                    |
|                | VANDAL6                        | 2                      | 2                    | 0                    |
|                | ATREP2A                        | 1                      | 0                    | 4                    |
|                | HELITRONY2                     | 1                      | 2                    | 0                    |
|                | ATMUNX1                        | 3                      | 1                    | 0                    |
|                | ATREP4                         | 2                      | 2                    | 0                    |

These TE families were formed using BLASTCLUST, with a coverage of 80%. Manual curation may result in these families being represented by fewer consensus sequences than indicated.
